## 1           **Inter-domain Horizontal Gene Transfer of Nickel-binding Superoxide Dismutase**

2           Kevin M. Sutherland<sup>1,\*</sup>, Lewis M. Ward<sup>1</sup>, Chloé-Rose Colombero<sup>1</sup>, David T. Johnston<sup>1</sup>

3  
4           <sup>1</sup>Department of Earth and Planetary Science, Harvard University, Cambridge, MA 02138

5           \*Correspondence to KMS: [ksutherland@fas.harvard.edu](mailto:ksutherland@fas.harvard.edu)

### 6 7           **Abstract**

8           The ability of aerobic microorganisms to regulate internal and external concentrations of the  
9           reactive oxygen species (ROS) superoxide directly influences the health and viability of cells.  
10           Superoxide dismutases (SODs) are the primary regulatory enzymes that are used by  
11           microorganisms to degrade superoxide. SOD is not one, but three separate, non-homologous  
12           enzymes that perform the same function. Thus, the evolutionary history of genes encoding for  
13           different SOD enzymes is one of convergent evolution, which reflects environmental selection  
14           brought about by an oxygenated atmosphere, changes in metal availability, and opportunistic  
15           horizontal gene transfer (HGT). In this study we examine the phylogenetic history of the protein  
16           sequence encoding for the nickel-binding metalloform of the SOD enzyme (SodN). A comparison  
17           of organismal and SodN protein phylogenetic trees reveals several instances of HGT, including  
18           multiple inter-domain transfers of the *sodN* gene from the bacterial domain to the archaeal domain.  
19           Nearly half of the archaeal members with *sodN* live in the photic zone of the marine water column.  
20           The *sodN* gene is widespread and characterized by apparent vertical gene transfer in some  
21           sediment-associated lineages within the Actinobacteriota (Actinobacteria) and Chloroflexota  
22           (Chloroflexi) phyla, suggesting the ancestral *sodN* likely originated in one of these clades before  
23           expanding its taxonomic and biogeographic distribution to additional microbial groups in the  
24           surface ocean in response to decreasing iron availability. In addition to decreasing iron quotas,  
25           nickel-binding SOD has the added benefit of withstanding high reactant and product ROS  
26           concentrations without damaging the enzyme, making it particularly well suited for the modern  
27           surface ocean.

## 28 **Introduction**

29           Molecular oxygen in the ground state is a diradical. The presence of these two unpaired  
30 electrons in parallel spin makes O<sub>2</sub> susceptible to univalent reduction, which will lead to the  
31 formation of reactive oxygen species (ROS) (Fridovich, 1978). When O<sub>2</sub> interacts with an electron  
32 donor such as a reduced metal or organic carbon and univalent reduction occurs, superoxide (O<sub>2</sub><sup>•-</sup>  
33 ) is formed. This reaction occurs in association with the core metabolic and physiological functions  
34 of microorganisms. Superoxide is produced at photosystem I during photosynthesis (Asada, 2006),  
35 at multiple locations along the electron transport chain in aerobic respiration (Larosa & Remacle,  
36 2018), and on the outer membrane of cells for a range of purposes including nutrient acquisition  
37 (Rose et al., 2008), cell signaling (Buetler et al., 2004), redox homeostasis (Diaz et al., 2019; Yuasa  
38 et al., 2020), and cell growth and proliferation (Carlioz & Touati, 1986; Oda et al., 1995; Saran,  
39 2003). Superoxide is a highly reactive molecule that typically has a lifetime on the order of a few  
40 minutes under physiological conditions (Diaz et al., 2013). It can further act as an oxidant or  
41 reductant in a wide range of consequential biogeochemical reactions involving nutrients, metals,  
42 organic carbon, and nitrogen species.

43           The evolution of oxygenic photosynthesis and subsequent Great Oxygenation Event (~2.3-  
44 2.4 Gya) greatly increased the energy available to fuel microbial metabolisms (Fischer et al., 2016;  
45 Ward et al., 2019). However, increasing oxygen levels is in many ways a double-edged sword.  
46 The potential to produce superoxide and other ROS would have increased in parallel with  
47 atmospheric oxygen levels, which can have a myriad of detrimental effects on cells (Taverne et  
48 al., 2018). The reactivity of superoxide with a wide range of organic moieties and metal cofactors  
49 can damage various cell components, including lipid membrane peroxidation and iron release from  
50 iron-sulfur clusters (Longo et al., 1999; Radi et al., 1991). Superoxide production can precede the  
51 formation of hydroxyl radical, which itself can have devastating effects on biomolecules (Buxton  
52 et al., 1988; Oda et al., 1992). The ability to manage and mitigate the deleterious consequences of  
53 superoxide and its downstream effects and reaction products is an inescapable challenge of life  
54 evolving in the presence of molecular oxygen.

55           Superoxide dismutase is the primary biological tool that microorganisms use to degrade  
56 superoxide, both within the cell membrane and in the environment. The presence of at least one  
57 copy of superoxide dismutase in the genome of all extant aerobic organisms (and many anaerobes)  
58 underscores its necessity in coping with reactive oxygen (Brioukhanov & Netrusov, 2004). The

59 name “superoxide dismutase” is used as a catch-all term to describe four different metalloforms of  
60 three distinct enzyme families that have no known homology. These four metalloforms include  
61 manganese (Mn) (gene: *sodA*, protein: SodA, enzyme: MnSOD), iron (Fe) (gene: *sodB*, protein:  
62 SodB, enzyme: FeSOD), copper and zinc (CuZn) (gene: *sodC*, protein: SodC, enzyme:  
63 CuZnSOD), and nickel (Ni) (gene: *sodN*, protein: SodN, enzyme: NiSOD)(Dupont et al., 2008;  
64 Wolfe-Simon et al., 2005). Only the Mn- and Fe-binding metalloforms have demonstrable  
65 homology (including a cambialistic isoform that can function with either Fe or Mn (Lancaster et  
66 al., 2004)), thus, superoxide dismutase is likely an example of convergent evolution in which life  
67 reinvented the wheel three separate times (No, 2017).

68 The concentration of oxygen, its influence on metal redox state, and the availability of each  
69 metal cofactor in the environment all present important selective pressures on determining the  
70 distribution of these different SOD-encoding genes spatially and throughout Earth History. While  
71 the true antiquity of these three enzyme families is not known with certainty, the relative ages have  
72 been inferred from a combination of phylogenetic arguments and likely environmental conditions  
73 on the ancient surface Earth. The FeSOD/MnSOD enzyme family is thought to be the most ancient  
74 of these three enzyme families (Hatchikian & Henry, 1977; Yost & Fridovich, 1973). This notion  
75 is evidenced by the observation that *sodA/sodB* is phylogenetically wide-spread, and because low  
76 atmospheric oxygen in the early Earth would have favored high concentrations of dissolved Fe<sup>2+</sup>  
77 and Mn<sup>2+</sup> (Wolfe-Simon et al., 2005). Conversely, CuZnSOD, thought to be the youngest of the  
78 three enzyme families, is widespread in higher plants and animals, present in some bacteria, and  
79 absent from archaea and protists (Case, 2017). This metalloform of SOD can also be localized to  
80 the cytoplasm, the nucleus, mitochondrial intermembrane space, chloroplasts, and extracellular  
81 space (Case, 2017; Weisiger & Fridovich, 1973). The presumed younger age of the CuZnSOD is  
82 supported by its relative scarcity among microorganisms, and the fact that Cu and Zn would have  
83 both been highly insoluble in an low-oxygen world (Case, 2017; Saito et al., 2003; Wolfe-Simon  
84 et al., 2005).

85 Intermediate in antiquity to the MnSOD/FeSOD and CuZnSOD enzymes, and the primary  
86 focus of this study, is Ni-binding superoxide dismutase. NiSOD is the most recently discovered of  
87 these three enzyme families (discovered in 1996), and has been the subject of less study than the  
88 other two enzyme families (Youn et al., 1996). The evolution and proliferation of NiSOD is  
89 thought to coincide with decreasing iron availability resulting from ocean oxygenation (Wolfe-

90 Simon et al., 2005). In fact, NiSOD is the most common metalloform of SOD in modern marine  
91 bacteria (Sheng et al., 2014). The abundance of NiSOD among marine Cyanobacteria has been  
92 used to suggest that NiSOD may have originated among marine phototrophs (Case, 2017; Wolfe-  
93 Simon et al., 2005). However, more recent work suggests that *sodN* originated within the  
94 Actinobacteriota clade before appearing in other clades through a combination of vertical and  
95 horizontal gene transfer (Schmidt et al., 2009). Currently, *sodN* is thought to be present primarily  
96 in bacterial clades, however, some instances of *sodN* in photosynthetic eukaryotes have been  
97 identified (Cuvelier et al., 2010). To date, *sodN* has not been identified in archaea (Sheng et al.,  
98 2014).

99         Given the ever-expanding availability of quality genomic data and analysis tools, we revisit  
100 the phylogeny of the NiSOD protein to better understand its evolutionary history and its  
101 distribution across the tree of life. We examine the role of vertical and horizontal gene transfer in  
102 the controlling the phylogeny of NiSOD sequences. With this information, we aim to better  
103 understand the environmental pressures that select for NiSOD over other SOD genes and  
104 contextualize the history of this gene within the broader scope of global biogeochemical cycles.

105

## 106 **Methods**

107 A reference database was constructed containing a single high-quality genome from every genus  
108 of bacteria and archaea for which one is available based on the GTDB database (Parks et al., 2018,  
109 2020). A list of all genomes included in the GTDB database was downloaded from the GTDB  
110 servers (<https://data.ace.uq.edu.au/public/gtdb/data/releases/>). Genomes that did not meet current  
111 metrics for high quality (e.g. completeness <90% or contamination >5%, (Bowers et al., 2017))  
112 were removed. This list was finally dereplicated to select a single genome of the highest available  
113 completeness from every genus. Genomes were then downloaded from the NCBI WGS and  
114 Genbank databases. This genome database was used to search for homologs of SodN and other  
115 proteins using the tblastn function of BLAST+ (Camacho et al., 2009). For organismal  
116 phylogenies, concatenated ribosomal protein phylogenies following methods from Hug et al.  
117 (2016) (Hug et al., 2016). Protein sequences were aligned with MUSCLE (Edgar, 2004) and  
118 phylogenetic trees were produced using RAxML v.8.2.12 (Stamatakis, 2014) on the Cipres  
119 Science Gateway (Miller et al., 2010). Node support was calculated using transfer bootstrap  
120 support with BOOSTER (Lemoine et al., 2018). Trees were visualized using the Interactive Tree

121 of Life Viewer (Letunic & Bork, 2016). Histories of horizontal gene transfer were assessed via  
122 incongruence of organismal and metabolic protein phylogenies as described previously (e.g.  
123 (Doolittle, 1986; Ward et al., 2020; Ward & Shih, 2020)). Assessment of genomic neighborhood  
124 of sodN genes was performed on the RAST platform (Aziz et al., 2008). In order to verify that  
125 NiSOD presence was authentic and not a case of false positives (i.e. gene presence in  
126 metagenome-assembled genomes due to contamination, e.g. (Ward et al., 2018)), we repeated  
127 analyses with a more stringent quality cutoff of a maximum of 3.5% contamination as determined  
128 by CheckM (Parks et al., 2015).

129

## 130 **Results**

131 We have produced the most complete phylogeny of NiSOD proteins available. The  
132 phylogenies of the organisms identified in this study and their respective SodN protein sequences  
133 are presented in Figures 1 and 2, respectively. This SodN phylogeny expands substantially on the  
134 small collection of characterized NiSOD-producing isolates to include many lineages known only  
135 or primarily from metagenome-assembled genomes (e.g. Patescibacteria) as well as cultured  
136 organisms in which the presence of NiSOD was previously undescribed (e.g. diverse  
137 Proteobacteria and Actinobacteriota). This more comprehensive view of the distribution of NiSOD  
138 provides a much more complete context for interpreting the evolutionary history of this enzyme  
139 family. At present, no homologous outgroup to the NiSOD protein family is known, and as a result  
140 it impossible to robustly root the NiSOD phylogeny. For ease of viewing Figure 2 is shown with  
141 an arbitrary midpoint root, but this is not intended to imply directionality of evolution.  
142 Nonetheless, our results provide valuable understanding to evolutionary relatedness between  
143 NiSOD sequences even if we are unable to pinpoint the origin of this enzyme family.

144 The presence of a small number of deep clades is readily visible in the NiSOD phylogeny.  
145 In particular, much of the diversity of NiSOD sequences belongs to a large clade made up primarily  
146 of sequences from Actinobacteriota, but also containing large clusters of sequences from  
147 Cyanobacteria and smaller lineages from other organisms (bottom half of Figure 2). The remainder  
148 of NiSOD diversity belongs to a somewhat smaller but more diverse clade made up largely of  
149 Chloroflexota sequences interspersed with sequences from Patescibacteria, Proteobacteria, and  
150 other organisms (top half of Figure 2). While each of these clades contains sequences from multiple  
151 bacterial phyla (and, surprisingly, multiple archaeal phyla), these clades are made up of a plurality

152 of and bounded by lineages of Actinobacterota and Chloroflexota, respectively. With few  
153 exceptions (e.g. Cyanobacteria), NiSOD sequences from a particular phylum are polyphyletic,  
154 scattered in multiple lineages separated by many sequences from other phyla. Moreover, the  
155 topology of phylogenetic relationships both within and between phyla are largely incongruent with  
156 organismal relationships, indicating many instances of interphylum horizontal gene transfer.

157 In contrast to previous claims (Sheng et al., 2014), we found that NiSOD are not absent  
158 from the archaeal domain. In fact, several clades of archaeal NiSOD exist, scattered throughout  
159 the enzyme phylogeny (Figure 2). The lack of reciprocal monophyly between bacterial and  
160 archaeal NiSOD sequences, and the incongruence between organismal and protein phylogenies  
161 (Figure 1, Figure 2), strongly suggests that the distribution of NiSOD genes throughout the tree of  
162 life is the result of multiple instances of interdomain horizontal gene transfer.

163

## 164 **Discussion**

165 Horizontal gene transfer (HGT) is commonplace in the microbial world. It is invoked to  
166 explain the distribution of a wide variety of genes that play a role in all aspects of metabolism and  
167 physiology. Evidence of inter-domain horizontal gene transfer, however, is much less  
168 commonplace. Generally speaking, the frequency of horizontal gene transfer between prokaryotes  
169 is thought to increase with increasing genetic similarity, meaning inter-domain horizontal gene  
170 transfer should be the rarest genetic transfer (Andam & Gogarten, 2011). In fact, clear instances  
171 of horizontal gene transfer between archaea and bacteria are fleeting and thought to be quite rare  
172 (Avni & Snir, 2020). It is clear from this study that NiSOD has indeed undergone multiple  
173 instances of horizontal gene transfer, including several instances of transfer from the bacterial  
174 domain to the archaeal domain.

175 NiSOD sequences are distributed throughout the bacterial domain, with most protein  
176 diversity distributed between two large clades made up primarily of Actinobacteriota and  
177 Chloroflexota. Substantial diversity of sequences derived from other bacterial and archaeal taxa  
178 appears interspersed within these two clades, apparently reflecting a long history of horizontal  
179 gene transfer within and between deep taxonomic groups including at the phylum and domain  
180 level. While support values for some shallow nodes are relatively poor (e.g. within closely related  
181 clades of Actinobacteriota sequences), support values for deep nodes including those between  
182 archaeal and bacterial lineages are robust, providing strong confidence in interpretations of



183 horizontal gene transfer. Because of our stringent quality cutoff for metagenome-assembled  
184 genomes (MAGs), we can confidently assert that the organismal source of NiSOD proteins is  
185 accurate, and does not reflect contamination or incorrect recruitment of sequences into MAGs,  
186 further strengthening interpretations of HGT.

187 Many apparent instances of HGT of NiSOD—including the bulk of interdomain transfer  
188 events—appear to have occurred between taxa that tend to inhabit similar niches within the same  
189 environment. For example, most Chloroflexota NiSOD sequences are from members of the  
190 Dehalocoicoidia class. Members of Dehalocoicoidia are abundant and diverse in marine  
191 sediment, terrestrial soil, and groundwater primarily as anaerobic heterotrophs (Taş et al., 2010;  
192 Wasmund et al., 2016). Nested within the Chloroflexota NiSOD sequences are at least three  
193 clusters of sequences from the Patescibacteria. Nested even deeper within Patescibacteria NiSOD  
194 clades are a few sequences derived from archaea including the Woesearchaea. Both Patescibacteria  
195 and Woesearchaea are thought to exploit similar strategies in the terrestrial subsurface as  
196 symbionts with highly reduced genomes and cell sizes (Brown et al., 2015; Castelle et al., 2015).  
197 This suggests the possibility that communities of predominantly anaerobic heterotrophs in  
198 terrestrial sediment may have exchanged NiSOD genes repeatedly over geologic time, likely as an  
199 adaptation to tolerate trace amounts of oxidants. This appears to have resulted in HGT of NiSOD  
200 from Chloroflexota to Patescibacteria in at least three events, followed by two transfers from  
201 Patescibacteria to Woesearchaea. In this case, it appears that colocalization and overlapping  
202 metabolic strategies has enabled repeated HGT between lineages that have diverged on the  
203 superphylum and even the domain level.

204 Similarly, interdomain HGT of NiSOD appears to have occurred between organisms in  
205 shared environments with similar life strategies. An example of this is seen within the  
206 Actinobacteriota clade of NiSOD sequences. Here, NiSOD sequences derived from the archaeal  
207 Poseidoniales clade appear nested within a deeper group of bacterial Marinisomata sequences.  
208 Both Marinisomata and Poseidoniales are primarily known to exist as water column heterotrophs,  
209 with Poseidoniales primarily restricted to the photic zone while Marinisomata exist throughout the  
210 water column (Huang & Wang, 2020; Rinke et al., 2019). This suggests a possible route of  
211 transmission of NiSOD genes from marine sediment Actinobacteriota, to water column  
212 Marinisomata, and ultimately to surface ocean Poseidoniales. A similar transmission process  
213 through different taxa moving up the water column may have led to the acquisition of NiSOD by

214 Cyanobacteria. However, Cyanobacteria and Poseidoniales NiSOD sequences are not closely  
215 related, suggesting that NiSOD sequences were introduced into the photic zone multiple times  
216 from multiple lineages. This repeated, directional migration of NiSOD genes through the  
217 environment, rather than extensive sharing of a single set of NiSOD genes simply within the photic  
218 zone, highlights that the successful horizontal transfer of genes can require more than simple  
219 colocalization of organisms and that multiple routes of transfer can be occurring into and within  
220 an environment at any given time.

221         There are two likely candidates for the clade in which *sodN* originated: Actinobacteriota  
222 and Chloroflexota. The *sodN* gene is widely distributed across both clades, and the phylogeny of  
223 the SodN protein largely resembles the organismal tree of these two clades. In the absence of a  
224 known outgroup, it is not formally possible to root SodN protein phylogenies (Figure 2 is  
225 arbitrarily midpoint rooted for clarity). As a result we cannot conclusively determine the origin or  
226 earliest representatives of the SodN enzyme. However, the abundance, diversity, and phylogenetic  
227 relationships of SodN sequences from Actinobacterota and Chloroflexota makes them prime  
228 candidates for the originators or earliest adopters of SodN. As previously highlighted, the  
229 Actinobacteriota clade encompasses organisms that live in a variety of environments, many of  
230 which are found in soil and sediment. The Chloroflexota phylum also contains incredible diversity  
231 in metabolism and environmental requirements. Notably, this phylum includes members that are  
232 thermophilic, heterotrophic, autotrophic, aerobic, and anaerobic (Islam et al., 2019).  
233 Representatives of the class Dehalococcoidia are well represented among the Chloroflexota  
234 members with *sodN*; these organisms are primarily found in terrestrial and marine sedimentary  
235 environments (Wasmund et al., 2014). Anaerolineae is the second most well represented  
236 Chloroflexota class in *sodN* diversity. This class contains members isolated from marine sediment,  
237 aquifers, and wastewater (Yamada & Sekiguchi, 2009). Although this class has been previously  
238 thought to include primarily obligate anaerobes that make a living from fermentation, several  
239 members contain genes for respiration (Hemp et al., 2015; Pace et al., 2015; Ward et al., 2015).  
240 The presence of NiSOD in diverse members of these two deeply rooted classes of Chloroflexota  
241 suggests the possibility that NiSOD was present in their last common ancestor. Molecular clock  
242 analyses have suggested that Anaerolineae and Dehalococcoidia diverged ~2.2 Gya (Shih et al.,  
243 2017), providing an indirect estimate for the antiquity of this enzyme family.



244 Comparison of organismal and SodN protein phylogenies can provide some limited insight  
245 into the timing of NiSOD evolution. If, as discussed above, the root of the NiSOD tree is near the  
246 branch separating the Chloroflexota and Actinobacterota clades (i.e. the midpoint root shown in  
247 Figure 2), this suggests that NiSOD was acquired by early members of these clades and has  
248 subsequently been vertically inherited into crown groups. Both Actinobacterota and Chloroflexota  
249 are phyla with obligately anaerobic basal lineages that are thought to have originated in Archean  
250 time before the Great Oxygenation Event, subsequently acquired aerobic respiration, and  
251 underwent radiation of class-level lineages during early Proterozoic time (Lewin et al., 2016; Shih  
252 et al., 2017). It therefore follows that NiSOD originated at about this time, most likely under low  
253 oxygen conditions in marine sediment or the water column. Though it may seem logical to  
254 constrain the timing of the evolution of NiSOD with the GOE and associated introduction of  
255 significant oxygen to marine environments, small amounts of oxygen can be produced by abiotic  
256 processes including photolysis or radiolysis of water—providing an evolutionary impetus for SOD  
257 evolution decoupled from biological oxygen production. The origin of NiSOD in late Archean or  
258 early Proterozoic time is further consistent with changing marine Ni availability through Earth  
259 history. Dissolved Ni concentrations have previously been hypothesized to be on the order of 400  
260 nM in the Archaean ocean, decreasing to ~200nM by 2.5 Gya (Konhauser et al., 2009, 2015).  
261 These concentration estimates are more than 2 orders of magnitude greater than modern seawater  
262 concentrations (Sclater et al., 1976). Whether the ancestral NiSOD evolved in the marine water  
263 column or in underlying sediment, it almost certainly evolved in an environment where Ni exceeds  
264 modern marine concentrations.

265 There are several reasons why the presence *sodN* in a microbial genome may provide an  
266 advantage for organisms over its Fe-binding counterpart. One curious aspect of NiSOD is that it  
267 is the only metalloform whose metal cofactor does not react with superoxide as a hydrated ion.  
268 While the “ping-pong” mechanism of catalysis is shared by all SODs (i.e. higher valent metal  
269 center oxidize superoxide, lower valent metal center reduces superoxide in an alternating fashion),  
270 the redox potential of Ni(II/III) redox pair is tuned to the appropriate redox potential by its  
271 coordination within the enzyme (Herbst et al., 2009). Therefore, the presence of Ni and its  
272 availability is not influenced by O<sub>2</sub> and ROS in the same way that Fe would be. The concentration  
273 of soluble Fe in seawater has decreased as a result of atmospheric oxygenation. Although estimates  
274 vary, Fe concentrations likely dropped from ~100 μM in Archaean seawater, to low μM or high

275 nM concentrations in the Proterozoic, to the near 1 nM dissolved Fe seen in the open ocean today  
276 (Holland, 1984). Today, Fe can be a limiting nutrient for primary productivity in many surface  
277 ocean regions, stemming from its use as cofactor in many different essential enzymes (Behrenfeld  
278 et al., 1996; Behrenfeld & Kolber, 1999). The utilization of NiSOD over FeSOD under such iron  
279 limitation provides a competitive advance in its ability to reduce iron quotas.

280 NiSOD may offer an additional competitive advantage beyond reducing cellular Fe quotas.  
281 The superoxide-dismutating activity of both FeSOD and NiSOD are inhibited by excess hydrogen  
282 peroxide, one of the two primary products of the dismutation reaction (Sheng et al., 2014).  
283 However, the H<sub>2</sub>O<sub>2</sub> inhibition of FeSOD and NiSOD work in fundamentally different ways.  
284 FeSOD inhibition by H<sub>2</sub>O<sub>2</sub> occurs through irreversible peroxidative damage of the enzyme that  
285 proceeds through a Fenton-type reaction. Inhibition of NiSOD, conversely, operates by reducing  
286 Ni(III) to Ni(II) without damaging the enzyme itself (Herbst et al., 2009). This inhibition is  
287 reversible, and SOD catalytic activity is restored once hydrogen peroxide levels drop below the  
288 inhibition threshold. Similar to FeSOD, CuZnSOD may also be irreversibly inhibited by excess  
289 H<sub>2</sub>O<sub>2</sub> (Gabbianelli et al., 2004). While MnSOD is not known to be inhibited by H<sub>2</sub>O<sub>2</sub>, its SOD  
290 activity is lessened slightly at higher concentrations of superoxide (Sheng et al., 2014), which, to  
291 our knowledge, has not been demonstrated for the other metalloforms.

292 In the surface ocean, superoxide and hydrogen peroxide production is wide-spread and  
293 results from a combination of light-dependent and light-independent reactions (Diaz et al., 2019;  
294 Sutherland et al., 2019; Vermilyea et al., 2010). Surface superoxide concentrations range from low  
295 pM to several nM in the open ocean, with higher concentrations typically found in productive  
296 surface waters (Sutherland, Grabb, et al., 2020; Sutherland, Wankel, et al., 2020). In some cases,  
297 superoxide may approach 100-200 nM in productive coral reef ecosystems (Diaz et al., 2016;  
298 Grabb et al., 2019). Hydrogen peroxide has a lifetime in seawater that is ~3 orders of magnitude  
299 longer than superoxide (i.e. typical H<sub>2</sub>O<sub>2</sub> lifetime is hours to days), and correspondingly has  
300 concentrations that range from low nM in the deep ocean to as high as several hundred nM in  
301 productive sunlit surface water (Hopwood et al., 2017; Yuan & Shiller, 2005). The ability of  
302 NiSOD to catalyze superoxide dismutation at near diffusion limited rates and withstand elevated  
303 concentrations of hydrogen peroxide may make it uniquely suited for microbial fitness in the  
304 surface ocean with modern oxygen levels.

305           There is observational evidence to support the notion that not all SOD enzymes are perfect  
306 replacements for one another, even when cofactor concentrations are replete. For example, one  
307 study examined the growth of two strains of *Synechococcus* under low and high Ni concentrations  
308 to compare Ni requirements for NiSOD and urease (Dupont et al., 2008). In that study, one strain's  
309 genome encoded for only NiSOD, while the other's genome encoded for both NiSOD and  
310 CuZnSOD. The authors showed that under low Ni concentrations and adequate fixed nitrogen  
311 (resulting in reduced Ni quotas for urease), Cu/ZnSOD could not replace NiSOD activity.  
312 However, not all cyanobacteria have NiSOD; FeSOD is represented across cyanobacterial  
313 diversity. Even still, this observation demonstrates that there are enzyme characteristics beyond  
314 the metal cofactor identity that select for certain SOD metalloforms; these are not well known and  
315 should be the target of future study.

316           Interestingly, 9 of the 26 archaea that we identified with NiSOD genes also contain genes  
317 for proteorhodopsins. All nine of these organisms belong to the Poseidoniales clade, which is one  
318 of the most widespread archaeal groups in surface ocean waters (Rinke et al., 2019). The selective  
319 pressures experienced by these archaea, including nutrient availability, light levels, and ROS  
320 levels, mirrors those experienced by cyanobacteria such as *Synechococcus* and *Prochlorococcus*,  
321 suggesting that the acquisition and expression of *sodN* plays a key role in microbial success in the  
322 modern ocean.

323

## 324 **Summary and Conclusion**

325           Using the Genome Taxonomy Database, we examined the phylogenetic relation of the  
326 nickel-binding metalloform of superoxide dismutase to better understand its evolutionary history  
327 and biogeography in the context of environmental constraints. We compared organismal  
328 phylogenies and NiSOD gene phylogenies to demonstrate that NiSOD has undergone multiple  
329 instances of inter-domain horizontal gene from bacteria to archaea. Actinobacteriota and  
330 Chloroflexota as two clades in which NiSOD is pervasive and in which the organismal phylogeny  
331 resembles that of the *sodN* gene. As such, these two clades are the most likely candidates for the  
332 evolutionary root of *sodN*. The distribution of NiSOD sequence diversity is consistent with one or  
333 more vertical migrations in biogeography, starting in soil or marine sediment and migrating to the  
334 photic zone. The acquisition of *sodN* as a means to mitigate iron-limitation is consistent with the  
335 biogeochemical history of the marine environment, however, other factors such as hardiness

336 against damage by the product hydrogen peroxide may also contribute to its proliferation in the  
337 surface ocean.

338

339 **Acknowledgements:**

340 This work was funded by an Agouron Institute geobiology postdoctoral fellowship (KMS), the  
341 Simons Foundation (Grant Number 653687 to LMW), and Harvard University (CRC, DTJ).

342

343 **Figures:**

344 Fig 1: Organismal phylogenetic tree determined using concatenated ribosomal protein sequences  
345 of organisms from the Genome Taxonomy Database that contain a *sodN* gene. We note that there  
346 are slightly fewer organisms in the organismal tree than in the SodN protein tree (Figure 2), this is  
347 due to either low completeness or poorly aligned concatenated ribosomal sequences. See methods  
348 for a complete description of tree production and quality cutoff metrics.

349

350 Fig 2: SodN protein sequence tree for organisms containing at least one copy of the *sodN* gene in  
351 the Genome Taxonomy Database.

352

353 Figure 1:

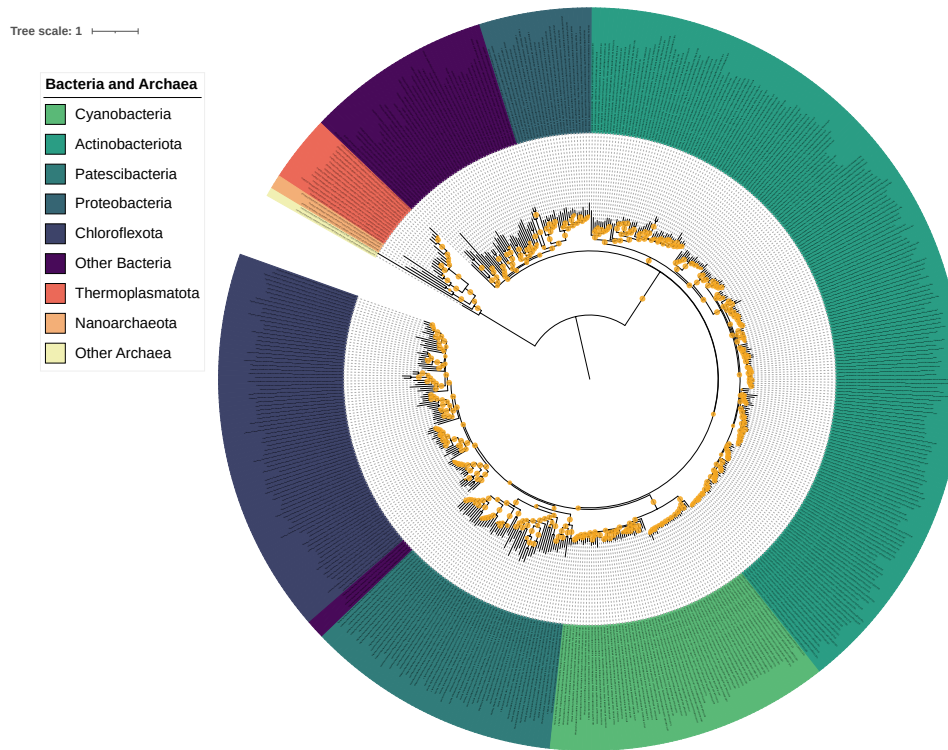

354

355

356 Figure 2:

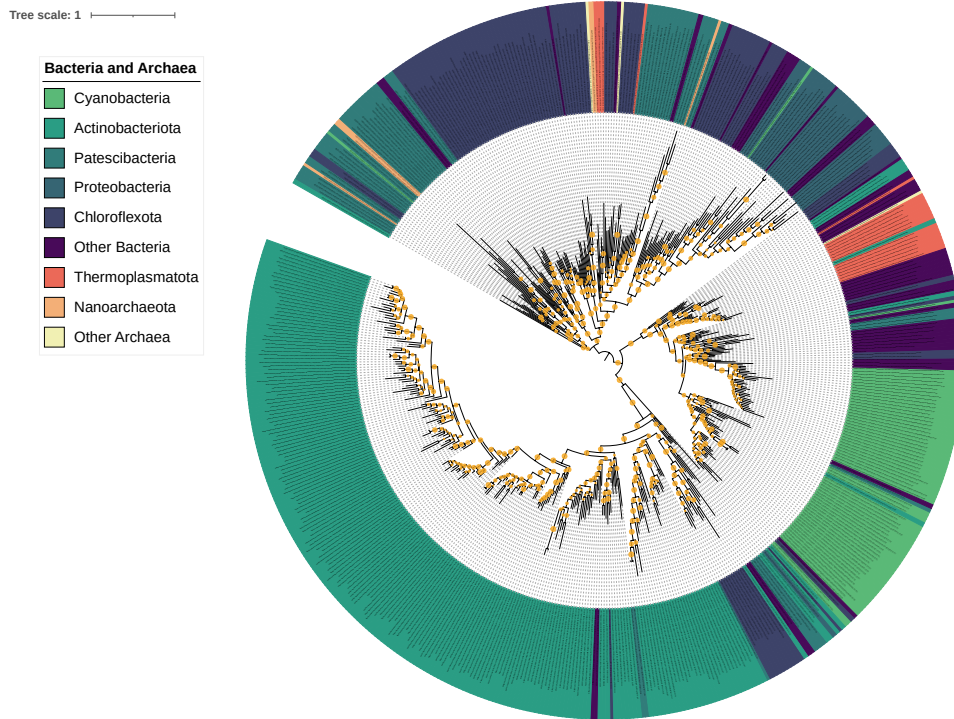

357



358 **References:**

- 359 Andam, C. P., & Gogarten, J. P. (2011). Biased gene transfer in microbial evolution. *Nature*  
360 *Reviews Microbiology*, 9(7), 543–555. <https://doi.org/10.1038/nrmicro2593>
- 361 Asada, K. (2006). Production and scavenging of reactive oxygen species in chloroplasts and their  
362 functions. *Plant Physiology*, 141(2), 391–396. <https://doi.org/10.1104/pp.106.082040>
- 363 Avni, E., & Snir, S. (2020). A New Phylogenomic Approach For Quantifying Horizontal Gene  
364 Transfer Trends in Prokaryotes. *Scientific Reports*, 10(1), 12425.  
365 <https://doi.org/10.1038/s41598-020-62446-5>
- 366 Aziz, R. K., Bartels, D., Best, A. A., DeJongh, M., Disz, T., Edwards, R. A., Formsma, K.,  
367 Gerdes, S., Glass, E. M., Kubal, M., Meyer, F., Olsen, G. J., Olson, R., Osterman, A. L.,  
368 Overbeek, R. A., McNeil, L. K., Paarmann, D., Paczian, T., Parrello, B., ... Zagnitko, O.  
369 (2008). The RAST Server: Rapid Annotations using Subsystems Technology. *BMC*  
370 *Genomics*, 9(1), 75. <https://doi.org/10.1186/1471-2164-9-75>
- 371 Behrenfeld, M. J., Bale, A. J., Kolber, Z. S., Aiken, J., & Falkowski, P. G. (1996). Confirmation  
372 of iron limitation of phytoplankton photosynthesis in the equatorial Pacific Ocean. *Nature*,  
373 383(6600), 508–511. <https://doi.org/10.1038/383508a0>
- 374 Behrenfeld, M. J., & Kolber, Z. S. (1999). Widespread Iron Limitation of Phytoplankton in the  
375 South Pacific Ocean. *Science*, 283(5403), 840–843.  
376 <https://doi.org/10.1126/science.283.5403.840>
- 377 Bowers, R. M., Kyrpides, N. C., Stepanauskas, R., Harmon-Smith, M., Doud, D., Reddy, T. B.  
378 K., Schulz, F., Jarett, J., Rivers, A. R., Eloe-Fadrosh, E. A., Tringe, S. G., Ivanova, N. N.,  
379 Copeland, A., Clum, A., Becraft, E. D., Malmstrom, R. R., Birren, B., Podar, M., Bork, P.,  
380 ... Woyke, T. (2017). Minimum information about a single amplified genome (MISAG)  
381 and a metagenome-assembled genome (MIMAG) of bacteria and archaea. *Nature*  
382 *Biotechnology*, 35(8), 725—731. <https://doi.org/10.1038/nbt.3893>
- 383 Brioukhanov, A. L., & Netrusov, A. I. (2004). Catalase and Superoxide Dismutase: Distribution,  
384 Properties, and Physiological Role in Cells of Strict Anaerobes. *Biochemistry (Moscow)*,  
385 69(9), 949–962. <https://doi.org/10.1023/B:BIRY.0000043537.04115.d9>
- 386 Brown, C. T., Hug, L. A., Thomas, B. C., Sharon, I., Castelle, C. J., Singh, A., Wilkins, M. J.,  
387 Wrighton, K. C., Williams, K. H., & Banfield, J. F. (2015). Unusual biology across a group  
388 comprising more than 15% of domain Bacteria. *Nature*, 523(7559), 208–211.  
389 <https://doi.org/10.1038/nature14486>
- 390 Buetler, T. M., Krauskopf, A., & Ruegg, U. T. (2004). Role of superoxide as a signaling  
391 molecule. *Physiology*, 19(3), 120–123.
- 392 Buxton, G. V., Greenstock, C. L., Helman, W. P., & Ross, A. B. (1988). Critical Review of rate  
393 constants for reactions of hydrated electrons, hydrogen atoms and hydroxyl radicals  
394 ( $\cdot\text{OH}/\text{O}^-$  in Aqueous Solution. *Journal of Physical and Chemical Reference Data*, 17(2),  
395 513–886. <https://doi.org/10.1063/1.555805>
- 396 Camacho, C., Coulouris, G., Avagyan, V., Ma, N., Papadopoulos, J., Bealer, K., & Madden, T.  
397 L. (2009). BLAST+: architecture and applications. *BMC Bioinformatics*, 10(1), 421.  
398 <https://doi.org/10.1186/1471-2105-10-421>
- 399 Carlouz, A., & Touati, D. (1986). Isolation of superoxide dismutase mutants in *Escherichia coli*:  
400 is superoxide dismutase necessary for aerobic life? *The EMBO Journal*, 5(3), 623–630.  
401 <https://doi.org/10.1002/j.1460-2075.1986.tb04256.x>
- 402 Case, A. J. (2017). On the origin of superoxide dismutase: an evolutionary perspective of  
403 superoxide-mediated redox signaling. *Antioxidants*, 6(4), 82.

- 404 Castelle, C. J., Wrighton, K. C., Thomas, B. C., Hug, L. A., Brown, C. T., Wilkins, M. J.,  
405 Frischkorn, K. R., Tringe, S. G., Singh, A., Markillie, L. M., Taylor, R. C., Williams, K. H.,  
406 & Banfield, J. F. (2015). Genomic Expansion of Domain Archaea Highlights Roles for  
407 Organisms from New Phyla in Anaerobic Carbon Cycling. *Current Biology*, 25(6), 690–  
408 701. <https://doi.org/https://doi.org/10.1016/j.cub.2015.01.014>
- 409 Cuvelier, M. L., Allen, A. E., Monier, A., McCrow, J. P., Messié, M., Tringe, S. G., Woyke, T.,  
410 Welsh, R. M., Ishoey, T., Lee, J.-H., Binder, B. J., DuPont, C. L., Latasa, M., Guigand, C.,  
411 Buck, K. R., Hilton, J., Thiagarajan, M., Caler, E., Read, B., ... Worden, A. Z. (2010).  
412 Targeted metagenomics and ecology of globally important uncultured eukaryotic  
413 phytoplankton. *Proceedings of the National Academy of Sciences*, 107(33), 14679–14684.  
414 <https://doi.org/10.1073/pnas.1001665107>
- 415 Diaz, J. M., Hansel, C. M., Apprill, A., Brighi, C., Zhang, T., Weber, L., McNally, S., & Xun, L.  
416 P. (2016). Species-specific control of external superoxide levels by the coral holobiont  
417 during a natural bleaching event. *Nature Communications*, 7.  
418 <https://doi.org/10.1038/ncomms13801>
- 419 Diaz, J. M., Hansel, C. M., Voelker, B. M., Mendes, C. M., Andeer, P. F., & Zhang, T. (2013).  
420 Widespread Production of Extracellular Superoxide by Heterotrophic Bacteria. *Science*,  
421 340(6137), 1223–1226. <https://doi.org/10.1126/science.1237331>
- 422 Diaz, J. M., Plummer, S., Hansel, C. M., Andeer, P. F., Saito, M. A., & Mcilvin, M. R. (2019).  
423 *NADPH-dependent extracellular superoxide production is vital to photophysiology in the*  
424 *marine diatom Thalassiosira oceanica*. 116(33). <https://doi.org/10.1073/pnas.1821233116>
- 425 Doolittle, R. F. (1986). *Of URFs and ORFs: A primer on how to analyze derived amino acid*  
426 *sequences*. University Science Books.
- 427 Dupont, C. L., Barbeau, K., & Palenik, B. (2008). Ni Uptake and Limitation in Marine  
428 Synechococcus Strains. *Applied and Environmental Microbiology*, 74(1), 23–31.  
429 <https://doi.org/10.1128/AEM.01007-07>
- 430 Edgar, R. C. (2004). MUSCLE: multiple sequence alignment with high accuracy and high  
431 throughput. *Nucleic Acids Research*, 32(5), 1792–1797. <https://doi.org/10.1093/nar/gkh340>
- 432 Fischer, W. W., Hemp, J., & Johnson, J. E. (2016). Evolution of Oxygenic Photosynthesis.  
433 *Annual Review of Earth and Planetary Sciences*, 44(1), 647–683.  
434 <https://doi.org/10.1146/annurev-earth-060313-054810>
- 435 Fridovich, I. (1978). The biology of oxygen radicals. *Science*, 201(4359), 875–880.  
436 <https://doi.org/10.1126/science.210504>
- 437 Gabbianelli, R., D’Orazio, M., Pacello, F., O’Neill, P., Nicolini, L., Rotilio, G., & Battistoni, A.  
438 (2004). Distinctive functional features in prokaryotic and eukaryotic Cu,Zn superoxide  
439 dismutases. *Biological Chemistry*, 385(8), 749–754. <https://doi.org/10.1515/bc.2004.091>
- 440 Grabb, K. C., Kapit, J., Wankel, S. D., Manganini, K., Apprill, A., Armenteros, M., & Hansel, C.  
441 M. (2019). Development of a Handheld Submersible Chemiluminescent Sensor:  
442 Quantification of Superoxide at Coral Surfaces. *Environmental Science & Technology*,  
443 53(23), 13850–13858. <https://doi.org/10.1021/acs.est.9b04022>
- 444 Hatchikian, E. C., & Henry, Y. A. (1977). An iron-containing superoxide dismutase from the  
445 strict anaerobe *Desulfovibrio desulfuricans* (Norway 4). *Biochimie*, 59(2), 153–161.  
446 [https://doi.org/https://doi.org/10.1016/S0300-9084\(77\)80286-1](https://doi.org/https://doi.org/10.1016/S0300-9084(77)80286-1)
- 447 Hemp, J., Ward, L. M., Pace, L. A., & Fischer, W. W. (2015). Draft Genome Sequence of  
448 *Levilinea saccharolytica* KIBI-1, a Member of the Chloroflexi Class Anaerolineae.  
449 *Microbiology Resource Announcements*, 3(6). <https://doi.org/10.1128/genomeA.01357-15>

- 450 Herbst, R. W., Guce, A., Bryngelson, P. A., Higgins, K. A., Ryan, K. C., Cabelli, D. E., Garman,  
451 S. C., & Maroney, M. J. (2009). Role of Conserved Tyrosine Residues in NiSOD Catalysis:  
452 A Case of Convergent Evolution. *Biochemistry*, *48*(15), 3354–3369.  
453 <https://doi.org/10.1021/bi802029t>
- 454 Holland, H. D. (1984). *The chemical evolution of the atmosphere and oceans*. Princeton  
455 University Press.
- 456 Hopwood, M. J., Rapp, I., Schlosser, C., & Achterberg, E. P. (2017). Hydrogen peroxide in deep  
457 waters from the Mediterranean Sea, South Atlantic and South Pacific Oceans. *Scientific*  
458 *Reports*, *7*, 43436.
- 459 Huang, J.-M., & Wang, Y. (2020). Genomic differences within the phylum Marinimicrobia:  
460 From waters to sediments in the Mariana Trench. *Marine Genomics*, *50*, 100699.  
461 <https://doi.org/https://doi.org/10.1016/j.margen.2019.100699>
- 462 Hug, L. A., Baker, B. J., Anantharaman, K., Brown, C. T., Probst, A. J., Castelle, C. J.,  
463 Butterfield, C. N., HERNSDORF, A. W., Amano, Y., Ise, K., Suzuki, Y., Dudek, N., Relman, D.  
464 A., Finstad, K. M., Amundson, R., Thomas, B. C., & Banfield, J. F. (2016). A new view of  
465 the tree of life. *Nature Microbiology*, *1*(5), 16048.  
466 <https://doi.org/10.1038/nmicrobiol.2016.48>
- 467 Islam, Z. F., Cordero, P. R. F., Feng, J., Chen, Y.-J., Bay, S. K., Jirapanjawat, T., Gleadow, R.  
468 M., Carere, C. R., Stott, M. B., Chiri, E., & Greening, C. (2019). Two Chloroflexi classes  
469 independently evolved the ability to persist on atmospheric hydrogen and carbon monoxide.  
470 *The ISME Journal*, *13*(7), 1801–1813. <https://doi.org/10.1038/s41396-019-0393-0>
- 471 Konhauser, K. O., Pecoits, E., Lalonde, S. V., Papineau, D., Nisbet, E. G., Barley, M. E., Arndt,  
472 N. T., Zahnle, K., & Kamber, B. S. (2009). Oceanic nickel depletion and a methanogen  
473 famine before the Great Oxidation Event. *Nature*, *458*(7239), 750–753.  
474 <https://doi.org/10.1038/nature07858>
- 475 Konhauser, K. O., Robbins, L. J., Pecoits, E., Peacock, C., Kappler, A., & Lalonde, S. V. (2015).  
476 The Archean Nickel Famine Revisited. *Astrobiology*, *15*(10), 804–815.  
477 <https://doi.org/10.1089/ast.2015.1301>
- 478 Lancaster, V. L., LoBrutto, R., Selvaraj, F. M., & Blankenship, R. E. (2004). A Cambialistic  
479 Superoxide Dismutase in the Thermophilic Photosynthetic Bacterium *Chloroflexus*  
480 *aurantiacus*. *Journal of Bacteriology*, *186*(11), 3408–3414.  
481 <https://doi.org/10.1128/JB.186.11.3408-3414.2004>
- 482 Larosa, V., & Remacle, C. (2018). Insights into the respiratory chain and oxidative stress.  
483 *Bioscience Reports*, *38*(5), BSR20171492. <https://doi.org/10.1042/BSR20171492>
- 484 Lemoine, F., Domelevo Entfellner, J.-B., Wilkinson, E., Correia, D., Dávila Felipe, M., De  
485 Oliveira, T., & Gascuel, O. (2018). Renewing Felsenstein’s phylogenetic bootstrap in the  
486 era of big data. *Nature*, *556*(7702), 452–456. <https://doi.org/10.1038/s41586-018-0043-0>
- 487 Letunic, I., & Bork, P. (2016). Interactive tree of life (iTOL) v3: an online tool for the display  
488 and annotation of phylogenetic and other trees. *Nucleic Acids Research*, *44*(W1), W242–  
489 W245. <https://doi.org/10.1093/nar/gkw290>
- 490 Lewin, G. R., Carlos, C., Chevrette, M. G., Horn, H. A., McDonald, B. R., Stankey, R. J., Fox,  
491 B. G., & Currie, C. R. (2016). Evolution and Ecology of Actinobacteria and Their  
492 Bioenergy Applications. *Annual Review of Microbiology*, *70*, 235–254.  
493 <https://doi.org/10.1146/annurev-micro-102215-095748>
- 494 Longo, V. D., Liou, L.-L., Valentine, J. S., & Gralla, E. B. (1999). Mitochondrial Superoxide  
495 Decreases Yeast Survival in Stationary Phase. *Archives of Biochemistry and Biophysics*,

- 496 365(1), 131–142. <https://doi.org/https://doi.org/10.1006/abbi.1999.1158>
- 497 Miller, M. A., Pfeiffer, W., & Schwartz, T. (2010). Creating the CIPRES Science Gateway for  
498 inference of large phylogenetic trees. *2010 Gateway Computing Environments Workshop*  
499 (*GCE*), 1–8. <https://doi.org/10.1109/GCE.2010.5676129>
- 500 No, M. S. (2017). Reinventing the Wheel: The NiSOD Story. *The Biological Chemistry of*  
501 *Nickel*, 10, 170.
- 502 Oda, T., Akaike, T., Sato, K., Ishimatsu, A., Takeshita, S., Muramatsu, T., & Maeda, H. (1992).  
503 Hydroxyl radical generation by red tide algae. *Archives of Biochemistry and Biophysics*,  
504 294(1), 38–43. [https://doi.org/https://doi.org/10.1016/0003-9861\(92\)90133-H](https://doi.org/https://doi.org/10.1016/0003-9861(92)90133-H)
- 505 Oda, T., Moritomi, J., Kawano, I., Hamaguchi, S., Ishimatsu, A., & Muramatsu, T. (1995).  
506 Catalase-and superoxide dismutase-induced morphological changes and growth inhibition  
507 in the red tide phytoplankton *Chattonella marina*. *Bioscience, Biotechnology, and*  
508 *Biochemistry*, 59(11), 2044–2048.
- 509 Pace, L. A., Hemp, J., Ward, L. M., & Fischer, W. W. (2015). Draft Genome of  
510 *Thermanaerotherrix daxensis* GNS-1, a Thermophilic Facultative Anaerobe from the  
511 Chloroflexi Class Anaerolineae. *Microbiology Resource Announcements*, 3(6).  
512 <https://doi.org/10.1128/genomeA.01354-15>
- 513 Parks, D. H., Chuvochina, M., Chaumeil, P.-A., Rinke, C., Mussig, A. J., & Hugenholtz, P.  
514 (2020). A complete domain-to-species taxonomy for Bacteria and Archaea. *Nature*  
515 *Biotechnology*, 38(9), 1079–1086. <https://doi.org/10.1038/s41587-020-0501-8>
- 516 Parks, D. H., Chuvochina, M., Waite, D. W., Rinke, C., Skarshewski, A., Chaumeil, P.-A., &  
517 Hugenholtz, P. (2018). A standardized bacterial taxonomy based on genome phylogeny  
518 substantially revises the tree of life. *Nature Biotechnology*, 36(10), 996–1004.  
519 <https://doi.org/10.1038/nbt.4229>
- 520 Parks, D. H., Imelfort, M., Skennerton, C. T., Hugenholtz, P., & Tyson, G. W. (2015). CheckM:  
521 assessing the quality of microbial genomes recovered from isolates, single cells, and  
522 metagenomes. *Genome Research*, 25(7), 1043–1055. <https://doi.org/10.1101/gr.186072.114>
- 523 Radi, R., Beckman, J. S., Bush, K. M., & Freeman, B. A. (1991). Peroxynitrite-induced  
524 membrane lipid peroxidation: The cytotoxic potential of superoxide and nitric oxide.  
525 *Archives of Biochemistry and Biophysics*, 288(2), 481–487.  
526 [https://doi.org/https://doi.org/10.1016/0003-9861\(91\)90224-7](https://doi.org/https://doi.org/10.1016/0003-9861(91)90224-7)
- 527 Rinke, C., Rubino, F., Messer, L. F., Youssef, N., Parks, D. H., Chuvochina, M., Brown, M.,  
528 Jeffries, T., Tyson, G. W., Seymour, J. R., & Hugenholtz, P. (2019). A phylogenomic and  
529 ecological analysis of the globally abundant Marine Group II archaea (Ca. Poseidoniales  
530 ord. nov.). *The ISME Journal*, 13(3), 663–675. <https://doi.org/10.1038/s41396-018-0282-y>
- 531 Rose, A. L., Webb, E. A., Waite, T. D., & Moffett, J. W. (2008). Measurement and implications  
532 of nonphotochemically generated superoxide in the equatorial Pacific Ocean.  
533 *Environmental Science & Technology*, 42(7), 2387–2393.  
534 <https://doi.org/10.1021/es7024609>
- 535 Saito, M. A., Sigman, D. M., & Morel, F. M. M. (2003). The bioinorganic chemistry of the  
536 ancient ocean: the co-evolution of cyanobacterial metal requirements and biogeochemical  
537 cycles at the Archean–Proterozoic boundary? *Inorganica Chimica Acta*, 356, 308–318.  
538 [https://doi.org/https://doi.org/10.1016/S0020-1693\(03\)00442-0](https://doi.org/https://doi.org/10.1016/S0020-1693(03)00442-0)
- 539 Saran, M. (2003). To what end does nature produce superoxide? NADPH oxidase as an autocrine  
540 modifier of membrane phospholipids generating paracrine lipid messengers. *Free Radical*  
541 *Research*, 37(10), 1045–1059.



- 542 Schmidt, A., Gube, M., Schmidt, A., & Kothe, E. (2009). In silico analysis of nickel containing  
543 superoxide dismutase evolution and regulation. *Journal of Basic Microbiology*, 49(1), 109–  
544 118. <https://doi.org/10.1002/jobm.200800293>
- 545 Sclater, F. R., Boyle, E., & Edmond, J. M. (1976). On the marine geochemistry of nickel. *Earth  
546 and Planetary Science Letters*, 31(1), 119–128. [https://doi.org/https://doi.org/10.1016/0012-  
547 821X\(76\)90103-5](https://doi.org/10.1016/0012-821X(76)90103-5)
- 548 Sheng, Y., Abreu, I. A., Cabelli, D. E., Maroney, M. J., Miller, A.-F., Teixeira, M., & Valentine,  
549 J. S. (2014). Superoxide Dismutases and Superoxide Reductases. *Chemical Reviews*,  
550 114(7), 3854–3918. <https://doi.org/10.1021/cr4005296>
- 551 Shih, P. M., Ward, L. M., & Fischer, W. W. (2017). Evolution of the 3-hydroxypropionate  
552 bicycle and recent transfer of anoxygenic photosynthesis into the Chloroflexi. *Proceedings  
553 of the National Academy of Sciences*, 114(40), 10749–10754.  
554 <https://doi.org/10.1073/pnas.1710798114>
- 555 Stamatakis, A. (2014). RAxML version 8: a tool for phylogenetic analysis and post-analysis of  
556 large phylogenies. *Bioinformatics*, 30(9), 1312–1313.  
557 <https://doi.org/10.1093/bioinformatics/btu033>
- 558 Sutherland, K. M., Coe, A., Gast, R. J., Plummer, S., Suffridge, C. P., Diaz, J. M., Bowman, J.  
559 S., Wankel, S. D., & Hansel, C. M. (2019). Extracellular superoxide production by key  
560 microbes in the global ocean. *Limnology and Oceanography*, 64(6), 2679–2693.  
561 <https://doi.org/10.1002/lno.11247>
- 562 Sutherland, K. M., Grabb, K. C., Karolewski, J. S., Plummer, S., Farfan, G. A., Wankel, S. D.,  
563 Diaz, J. M., Lamborg, C. H., & Hansel, C. M. (2020). Spatial Heterogeneity in Particle-  
564 Associated, Light-Independent Superoxide Production within Productive Coastal Waters.  
565 *Journal of Geophysical Research: Oceans*, n/a(n/a), e2020JC016747.  
566 <https://doi.org/10.1029/2020JC016747>
- 567 Sutherland, K. M., Wankel, S. D., & Hansel, C. M. (2020). Dark biological superoxide  
568 production as a significant flux and sink of marine dissolved oxygen. *Proceedings of the  
569 National Academy of Sciences*, 117(7), 3433–3439.  
570 <https://doi.org/10.1073/pnas.1912313117>
- 571 Taş, N., Van Eekert, M. H. A., De Vos, W. M., & Smidt, H. (2010). The little bacteria that can –  
572 diversity, genomics and ecophysiology of ‘Dehalococcoides’ spp. in contaminated  
573 environments. *Microbial Biotechnology*, 3(4), 389–402. [https://doi.org/10.1111/j.1751-  
574 7915.2009.00147.x](https://doi.org/10.1111/j.1751-7915.2009.00147.x)
- 575 Taverne, Y. J., Merkus, D., Bogers, A. J., Halliwell, B., Duncker, D. J., & Lyons, T. W. (2018).  
576 Reactive Oxygen Species: Radical Factors in the Evolution of Animal Life: A molecular  
577 timescale from Earth’s earliest history to the rise of complex life. *BioEssays*, 40(3),  
578 1700158.
- 579 Vermilyea, A. W., Paul Hansard, S., & Voelker, B. M. (2010). Dark production of hydrogen  
580 peroxide in the Gulf of Alaska. *Limnology and Oceanography*, 55(2), 580–588.  
581 <https://doi.org/10.4319/lo.2010.55.2.0580>
- 582 Ward, L. M., Hemp, J., Pace, L. A., & Fischer, W. W. (2015). Draft Genome Sequence of  
583 *Leptolinea tardivitalis* YMTK-2, a Mesophilic Anaerobe from the Chloroflexi Class  
584 Anaerolineae. *Microbiology Resource Announcements*, 3(6).  
585 <https://doi.org/10.1128/genomeA.01356-15>
- 586 Ward, L. M., Lingappa, U. F., Grotzinger, J. P., & Fischer, W. W. (2020). Microbial mats in the  
587 Turks and Caicos Islands reveal diversity and evolution of phototrophy in the Chloroflexota

- 588 order Aggregatilineales. *Environmental Microbiome*, 15(1), 9.  
589 <https://doi.org/10.1186/s40793-020-00357-8>
- 590 Ward, L. M., Rasmussen, B., & Fischer, W. W. (2019). Primary Productivity Was Limited by  
591 Electron Donors Prior to the Advent of Oxygenic Photosynthesis. *Journal of Geophysical*  
592 *Research: Biogeosciences*, 124(2), 211–226. <https://doi.org/10.1029/2018JG004679>
- 593 Ward, L. M., & Shih, P. M. (2020). Granick Revisited: Synthesizing Evolutionary and  
594 Ecological Evidence for the Late Origin of Bacteriochlorophyll via Ghost Lineages and  
595 Horizontal Gene Transfer. *BioRxiv*. <https://doi.org/10.1101/2020.09.01.277905>
- 596 Ward, L. M., Shih, P. M., & Fischer, W. W. (2018). MetaPOAP: presence or absence of  
597 metabolic pathways in metagenome-assembled genomes. *Bioinformatics*, 34(24), 4284–  
598 4286. <https://doi.org/10.1093/bioinformatics/bty510>
- 599 Wasmund, K., Cooper, M., Schreiber, L., Lloyd, K. G., Baker, B. J., Petersen, D. G., Jørgensen,  
600 B. B., Stepanauskas, R., Reinhardt, R., Schramm, A., Loy, A., & Adrian, L. (2016). Single-  
601 Cell Genome and Group-Specific *dsrAB* Sequencing Implicate Marine Members of the  
602 Class Dehalococcoidia (Phylum Chloroflexi) in Sulfur Cycling. *MBio*, 7(3).  
603 <https://doi.org/10.1128/mBio.00266-16>
- 604 Wasmund, K., Schreiber, L., Lloyd, K. G., Petersen, D. G., Schramm, A., Stepanauskas, R.,  
605 Jørgensen, B. B., & Adrian, L. (2014). Genome sequencing of a single cell of the widely  
606 distributed marine subsurface Dehalococcoidia, phylum Chloroflexi. *The ISME Journal*,  
607 8(2), 383–397. <https://doi.org/10.1038/ismej.2013.143>
- 608 Weisiger, R. A., & Fridovich, I. (1973). Superoxide dismutase organelle specificity. *Journal of*  
609 *Biological Chemistry*, 248(10), 3582–3592.
- 610 Wolfe-Simon, F., Grzebyk, D., Schofield, O., & Falkowski, P. G. (2005). The Role and  
611 Evolution of Superoxide Dismutases in Algae. *Journal of Phycology*, 41(3), 453–465.  
612 <https://doi.org/10.1111/j.1529-8817.2005.00086.x>
- 613 Yamada, T., & Sekiguchi, Y. (2009). Cultivation of Uncultured *Chloroflexi* Subphyla:  
614 Significance and Ecophysiology of Formerly Uncultured *Chloroflexi* “Subphylum I” with  
615 Natural and Biotechnological Relevance. *Microbes and Environments, adpub*, 908180110.  
616 <https://doi.org/10.1264/jsme2.ME09151S>
- 617 Yost, F. J., & Fridovich, I. (1973). An iron-containing superoxide dismutase from *Escherichia*  
618 *coli*. *Journal of Biological Chemistry*, 248(14), 4905–4908.
- 619 Youn, H.-D., Kim, E.-J., Roe, J.-H., Hah, Y. C., & Kang, S.-O. (1996). A novel nickel-  
620 containing superoxide dismutase from *Streptomyces* spp. *Biochemical Journal*, 318(3),  
621 889–896. <https://doi.org/10.1042/bj3180889>
- 622 Yuan, J., & Shiller, A. M. (2005). Distribution of hydrogen peroxide in the northwest Pacific  
623 Ocean. *Geochemistry, Geophysics, Geosystems*, 6(9).  
624 <https://doi.org/10.1029/2004GC000908>
- 625 Yuasa, K., Shikata, T., Kitatsuji, S., Yamasaki, Y., & Nishiyama, Y. (2020). Extracellular  
626 secretion of superoxide is regulated by photosynthetic electron transport in the noxious red-  
627 tide-forming raphidophyte *Chattonella antiqua*. *Journal of Photochemistry and*  
628 *Photobiology B: Biology*, 205, 111839.  
629 <https://doi.org/https://doi.org/10.1016/j.jphotobiol.2020.111839>  
630
